# Supplementary material for: Compositional Analysis of Glycosaminoglycans in Different Lung Cancer Types—A Pilot Study
Source: Int J Mol Sci. 2023 Apr 11;24(8):7050. doi: 10.3390/ijms24087050 (PMC10138872; doi:10.3390/ijms24087050)
Supplement: Supplementary file 1 [file ijms-24-07050-s001.zip › ijms-2285152-supplementary.pdf]

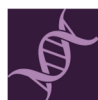

## Supplementary information

Table S1. Statistically significant changes identified for chondroitin sulfate disaccharides.

| The compared sample groups    | Aspect of comparison         | Tissue type | Number of tumor samples | Number of tumor adjacent samples | Statistical test | p-value           | The degree of deviation (fold change) |
|-------------------------------|------------------------------|-------------|-------------------------|----------------------------------|------------------|-------------------|---------------------------------------|
| All tumor and all adjacent    | Total quantity               |             | 41                      | 36                               | Wilcoxon         | <10 <sup>-4</sup> | 2.212                                 |
|                               | D0a0 quantity                |             | 41                      | 36                               | Wilcoxon         | <10 <sup>-6</sup> | 0.753                                 |
|                               | D0a4 quantity                |             | 41                      | 32                               | Wilcoxon         | <10 <sup>-6</sup> | 4.057                                 |
|                               | D0a6 quantity                |             | 41                      | 32                               | Wilcoxon         | <10 <sup>-5</sup> | 2.331                                 |
|                               | Average sulfation            |             | 41                      | 36                               | Wilcoxon         | <10 <sup>-6</sup> | 2.443                                 |
|                               | D0a6/D0a4-sulfation ratio    |             | 41                      | 36                               | Student t        | <10 <sup>-2</sup> | 0.830                                 |
| Tumor and respective adjacent | D0a0 quantity                | AC          | 12                      | 9                                | Wilcoxon         | <10 <sup>-2</sup> | 0.767                                 |
|                               |                              | SCLC        | 10                      | 10                               | Student t        | <0.05             | 0.799                                 |
|                               |                              | SqCC        | 9                       | 8                                | Student t        | <10 <sup>-2</sup> | 0.669                                 |
|                               |                              | LCC         | 10                      | 9                                | Student t        | <0.05             | 0.753                                 |
|                               | D0a4 quantity                | AC          | 12                      | 6                                | Welch t          | <0.05             | 3.241                                 |
|                               |                              | SCLC        | 10                      | 10                               | Welch t          | <0.05             | 3.513                                 |
|                               |                              | SqCC        | 9                       | 8                                | Welch t          | <0.05             | 5.905                                 |
|                               |                              | LCC         | 10                      | 8                                | Wilcoxon         | <0.05             | 4.625                                 |
|                               | D0a6 quantity                | AC          | 12                      | 6                                | Wilcoxon         | <0.05             | 4.168                                 |
|                               |                              | SqCC        | 9                       | 8                                | Student t        | <0.05             | 2.820                                 |
|                               |                              | LCC         | 9                       | 8                                | Student t        | <0.05             | 3.166                                 |
|                               | Total quantity               | AC          | 12                      | 9                                | Wilcoxon         | <0.05             | 1.991                                 |
|                               |                              | SqCC        | 9                       | 8                                | Wilcoxon         | <0.05             | 3.068                                 |
|                               |                              | LCC         | 10                      | 9                                | Wilcoxon         | <0.05             | 2.294                                 |
|                               | Average sulfation            | AC          | 12                      | 9                                | Wilcoxon         | <10 <sup>-2</sup> | 3.238                                 |
|                               |                              | SCLC        | 10                      | 10                               | Student t        | <0.05             | 1.809                                 |
|                               |                              | SqCC        | 9                       | 8                                | Student t        | <10 <sup>-2</sup> | 2.673                                 |
|                               |                              | LCC         | 10                      | 9                                | Student t        | <0.05             | 2.779                                 |
|                               | D0a6/D0a4-sulfation ratio    | SCLC        | 10                      | 10                               | Student t        | <10 <sup>-2</sup> | 0.673                                 |
|                               |                              | SqCC        | 9                       | 8                                | Student t        | <0.05             | 0.719                                 |
|                               |                              | LCC         | 10                      | 9                                | Student t        | <0.05             | 0.786                                 |
| Investigated tumor types      | AC D0a6/D0a4-sulfation ratio | AC          | 12                      | 0                                |                  |                   |                                       |
|                               |                              | SCLC        | 10                      | 0                                | Student t        | <10 <sup>-2</sup> | 1.443                                 |
|                               |                              | SqCC        | 9                       | 0                                | Student t        | <10 <sup>-2</sup> | 1.503                                 |
|                               |                              | LCC         | 10                      | 0                                | Student t        | <10 <sup>-2</sup> | 1.432                                 |

Table S2. Statistically significant changes identified for heparan sulfate disaccharides.

| The compared sample groups | Aspect of comparison | Number of tumor samples | Number of tumor adjacent samples | Statistical test | p-value           | The degree of deviation (fold change) |
|----------------------------|----------------------|-------------------------|----------------------------------|------------------|-------------------|---------------------------------------|
| All tumor and all adjacent | D2A0+D0A6 quantity   | 37                      | 31                               | Wilcoxon         | <10 <sup>-2</sup> | 1.886                                 |
|                            | D2S0+D0S6 quantity   | 40                      | 36                               | Wilcoxon         | <0.05             | 0.796                                 |
|                            | Mono N/O-sulfation   | 36                      | 31                               | Wilcoxon         | <10 <sup>-2</sup> | 0.599                                 |
|                            | Di N/O-sulfation     | 40                      | 36                               | Wilcoxon         | <0.05             | 0.952                                 |
|                            | Total N/O-sulfation  | 40                      | 36                               | Student t        | <10 <sup>-2</sup> | 0.759                                 |

Table S3. The molecular structure, the traditional name, the Lawrence code and the analyzed m/z values of the HS disaccharides. The D2A0/D0A6 and D2S0/D0S6 isomers were not differentiated in this study.

| Disaccharide structure | Traditional name | Lawrence code | m/z (–) mode                         |
|------------------------|------------------|---------------|--------------------------------------|
|                        | ΔHexA-GlcNAc     | D0A0          | 378.10                               |
|                        | ΔHexA2S-GlcNAc   | D2A0          | 458.10<br>247.50                     |
|                        | ΔHexA-GlcNAc6S   | D0A6          | 458.10<br>247.50                     |
|                        | ΔHexA-GlcNS      | D0S0          | 416.10<br>438.10<br>207.50           |
|                        | ΔHexA2S-GlcNAc6S | D2A6          | 538.05<br>560.05<br>576.00<br>286.50 |
|                        | ΔHexA2S-GlcNS    | D2S0          | 496.00<br>416.10<br>247.50           |

|                                                                                   |                 |      |        |
|-----------------------------------------------------------------------------------|-----------------|------|--------|
| 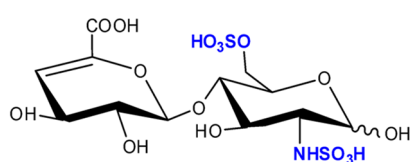 | ΔHexA-GlcNS6S   | D0S6 | 496.00 |
|                                                                                   |                 |      | 416.10 |
|                                                                                   |                 |      | 247.50 |
| 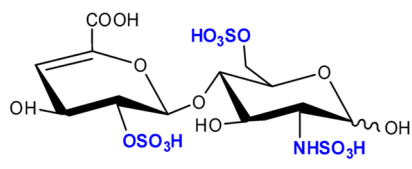 | ΔHexA2S-GlcNS6S | D2S6 | 576.00 |
|                                                                                   |                 |      | 306.50 |
|                                                                                   |                 |      | 298.50 |
|                                                                                   |                 |      | 247.50 |
|                                                                                   |                 |      | 191.30 |

Table S4. The molecular structure, the traditional name, the Lawrence code and the analyzed m/z values of the CS disaccharides. The D0a4 and D0a6 disaccharides are positional isomers and their differentiation was made via MS/MS transition.

| Disaccharide structure                                                              | Traditional name | Lawrence code | m/z (–) mode                         | MS/MS transition |
|-------------------------------------------------------------------------------------|------------------|---------------|--------------------------------------|------------------|
| 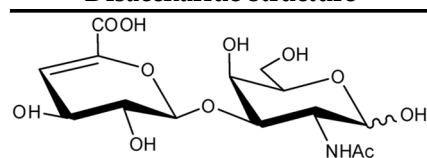  | ΔHexA-GalNAc     | D0a0          | 378.10                               |                  |
| 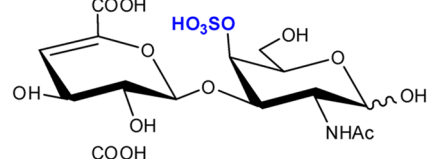 | ΔHexA-GalNAc4S   | D0a4          | 458.10<br>247.50                     | 300.10           |
| 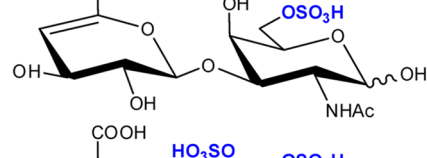 | ΔHexA-GalNAc6S   | D0a6          | 458.10<br>247.50                     | 282.10           |
| 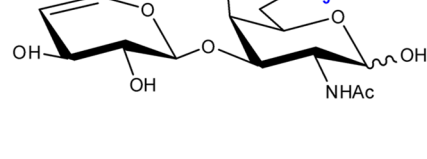 | ΔHexA-GalNAc4S6S | D0a10         | 538.05<br>560.05<br>576.00<br>268.50 |                  |

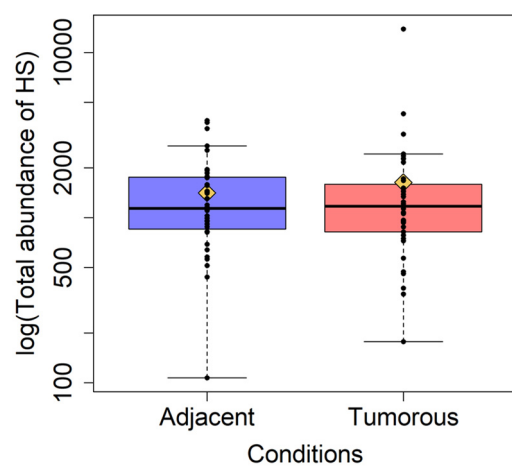

Figure S1. The total quantity of HS disaccharides in all the tumor and all the tumor adjacent samples. There is no significant change between the two sample groups.

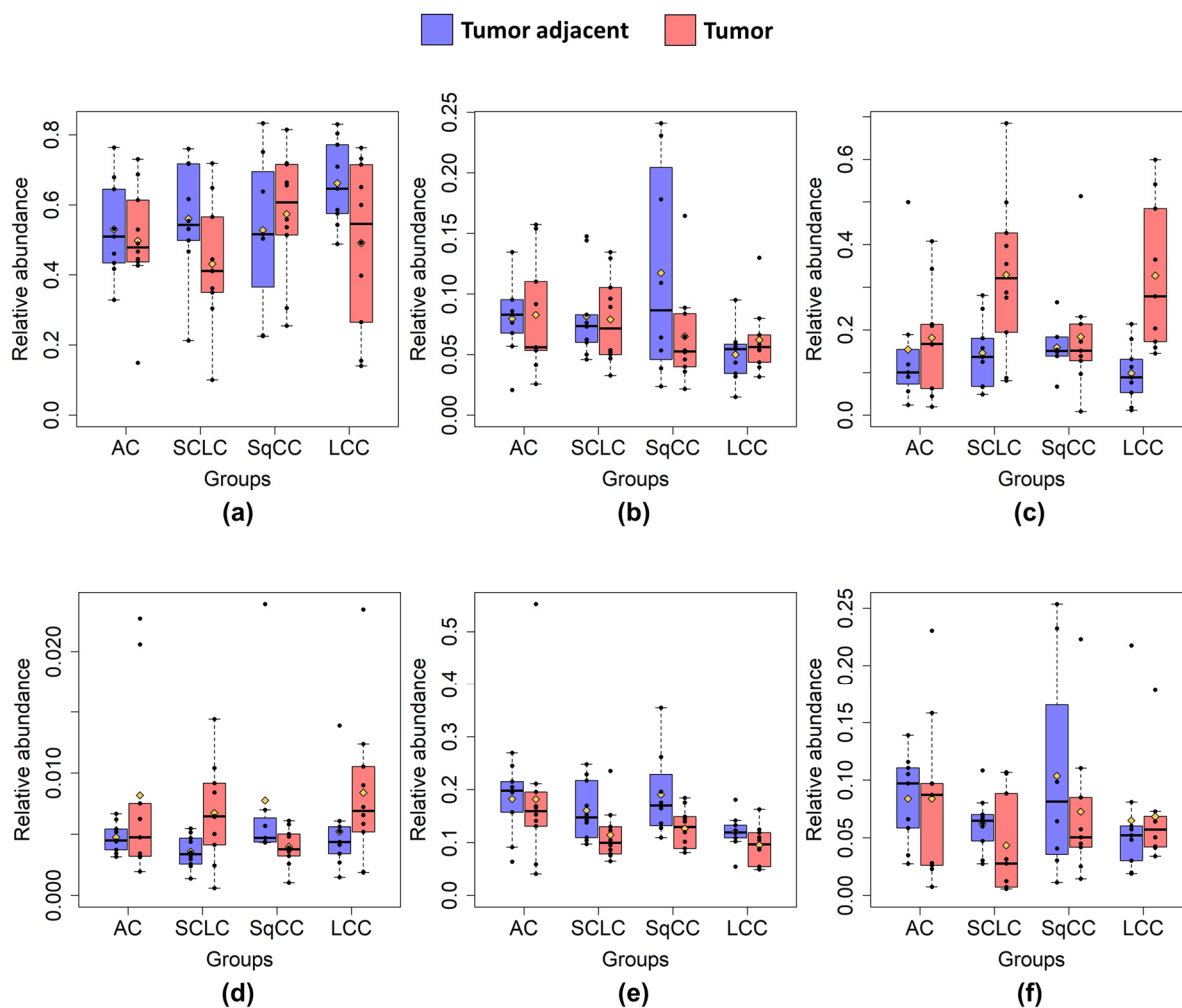

Figure S2. HS sulfation characteristics between tumor and tumor adjacent samples. (a): D0A0 relative abundance; (b): D0S0 relative abundance; (c): D02A0+D0A6 relative abundance; (d): D2A6 relative abundance; (e): D2S0+D0S6 relative abundance; (f): D2S6 relative abundance. Blue boxes represent tumor adjacent normal samples, while red boxes represent tumor samples. (AC: adenocarcinoma, SCLC: small cell lung cancer, SqCC: squamous cell carcinoma, LCC: large cell carcinoma).

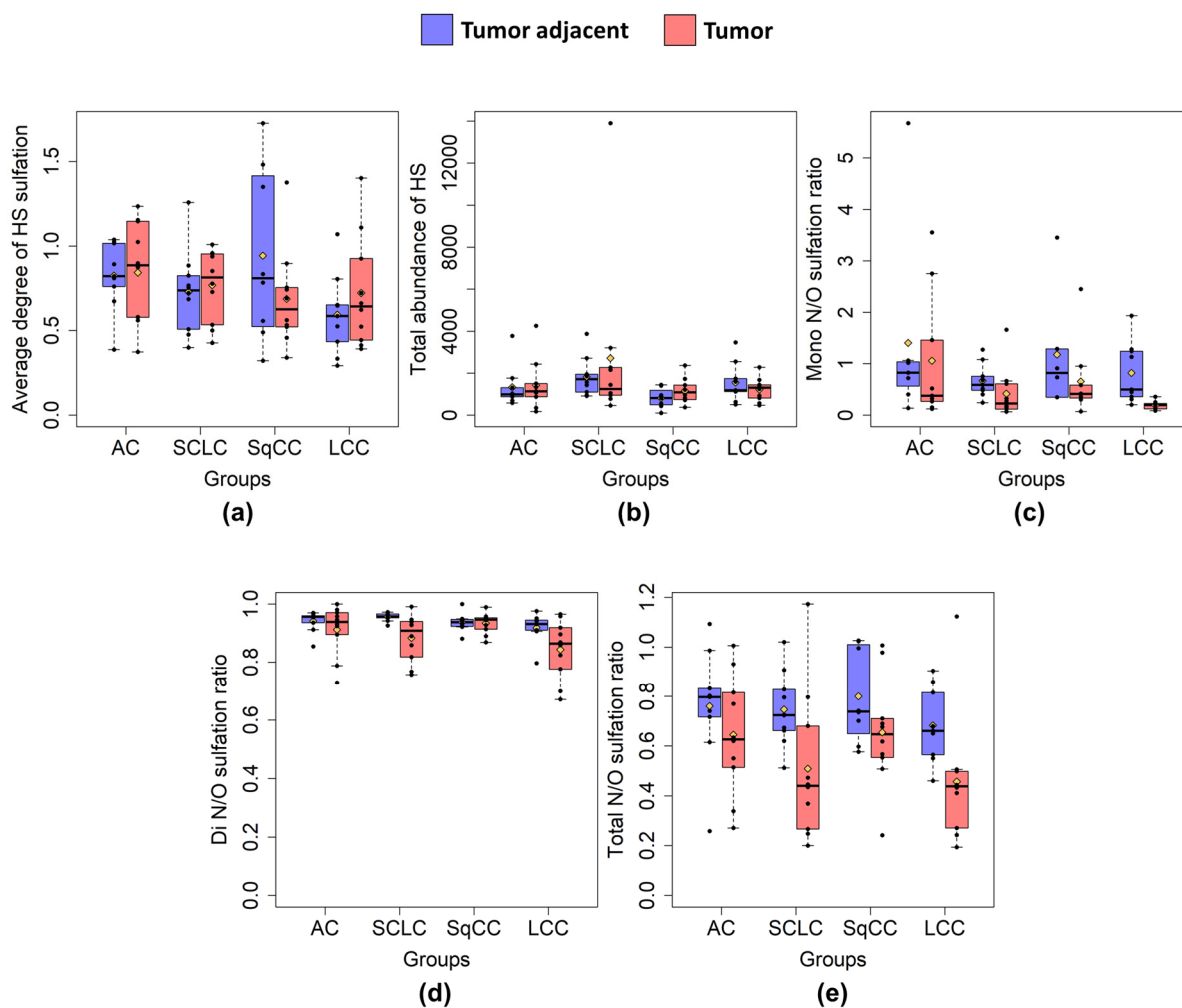

Figure S3. HS sulfation characteristics between tumor and tumor adjacent samples. (a): average sulfation of HS; (b): total quantity of HS; (c): mono-N/O-sulfation ratio; (d): di-N/O-sulfation ratio; (e): total N/O-sulfation ratio of HS. Blue boxes represent tumor adjacent normal samples, while red boxes represent tumor samples. (AC: adenocarcinoma, SCLC: small cell lung cancer, SqCC: squamous cell carcinoma, LCC: large cell carcinoma).

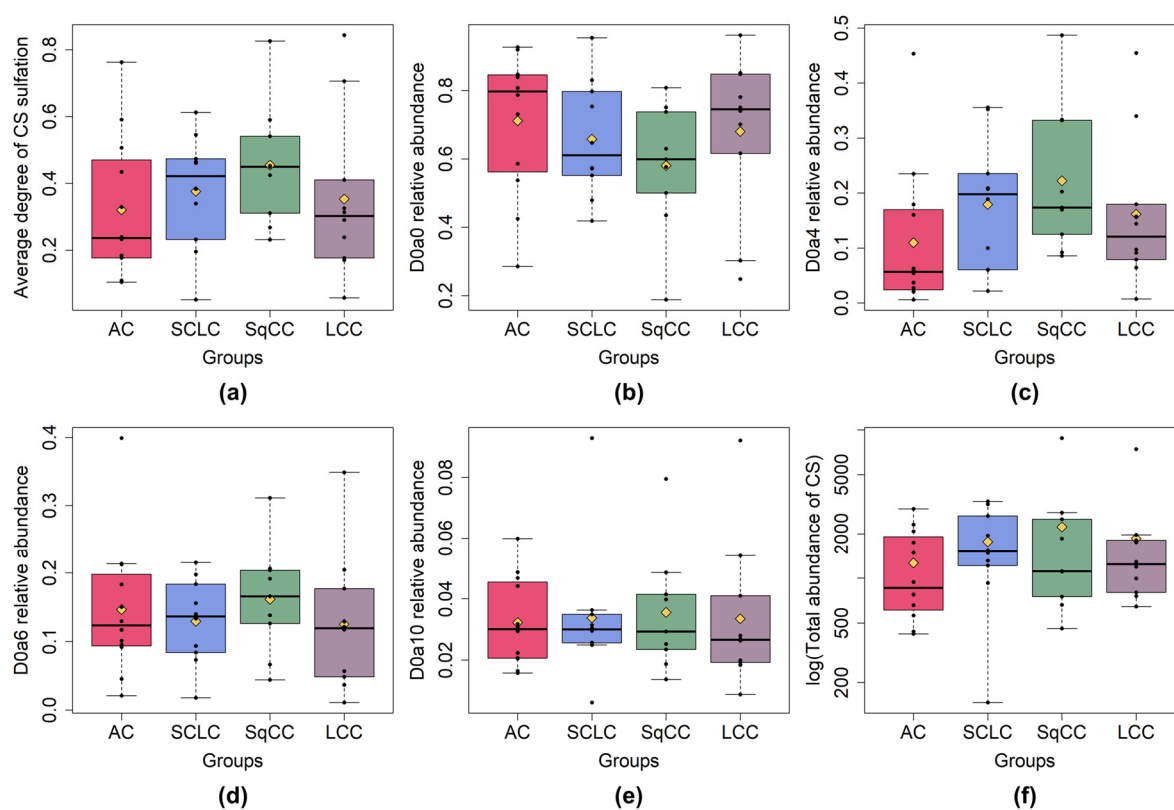

Figure S4. CS sulfation characteristics between tumor types. (a): average degree of sulfation; (b): D0a0 relative abundance, (c): D0a4 relative abundance, (d): D0a6 relative abundance, (e): D0a10 relative abundance, (f): total CS abundance. (AC: adenocarcinoma, SCLC: small cell lung cancer, SqCC: squamous cell carcinoma, LCC: large cell carcinoma).

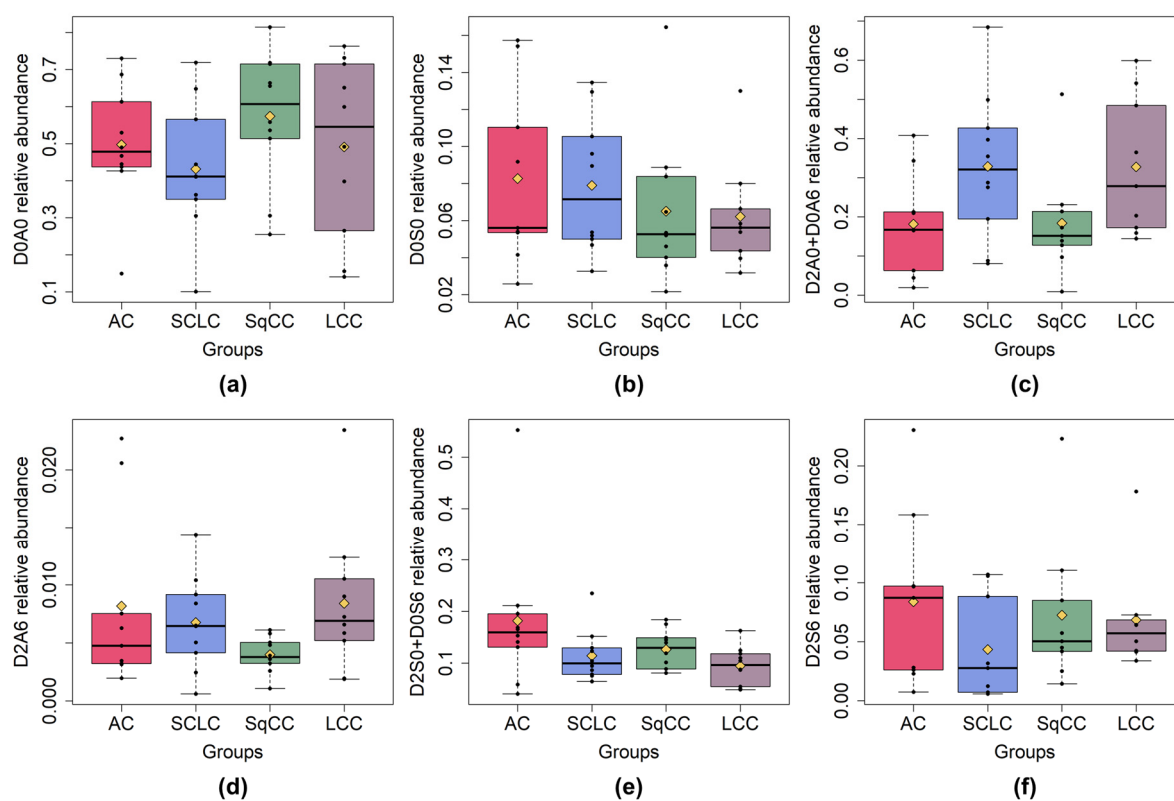

Figure S5. HS relative abundances between tumor types. (a): D0A0; (b): D0S0, (c): D0A0+D0A6, (d): D2A6, (e): D2S0+D0S6 (f): D2S6 relative abundance. (AC: adenocarcinoma, SCLC: small cell lung cancer, SqCC: squamous cell carcinoma, LCC: large cell carcinoma).

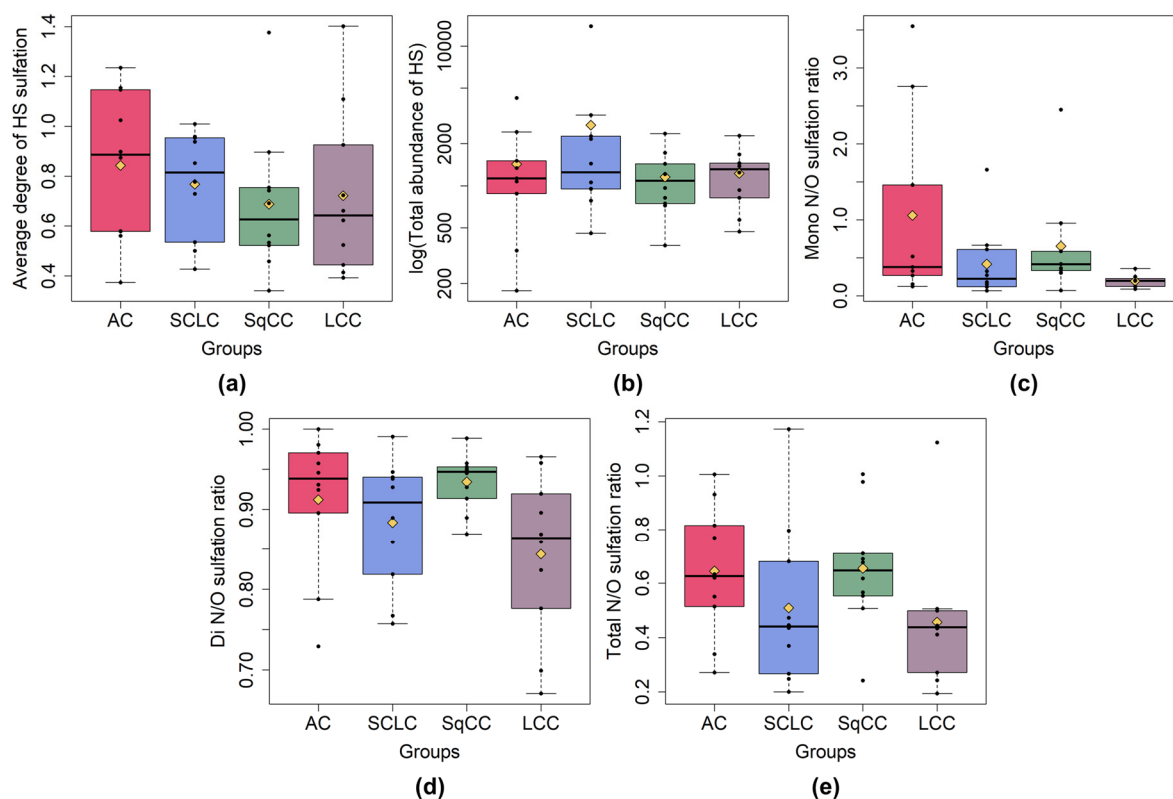

Figure S6. HS sulfation characteristics between tumor types. (a): average degree of sulfation; (b): total HS abundance, (c): mono-N/O- sulfation ratio, (d): di-N/O- sulfation ratio, (e): total-N/O-sulfation ratio. (AC: adenocarcinoma, SCLC: small cell lung cancer, SqCC: squamous cell carcinoma, LCC: large cell carcinoma).

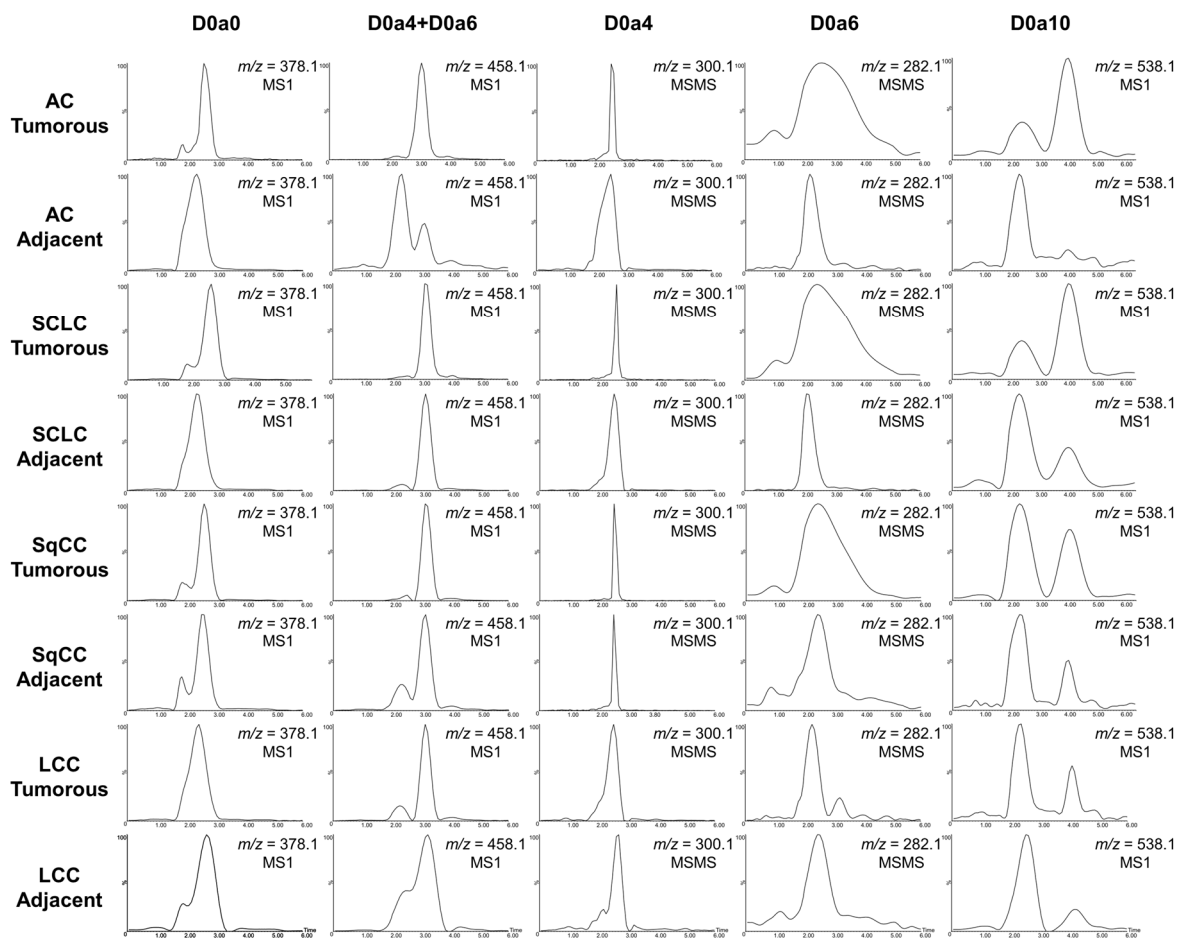

Figure S7. Representative extracted ion chromatograms of CS disaccharides of the investigated LC tumor types and tumor adjacent normal regions. (AC: adenocarcinoma, SCLC: small cell lung cancer, SqCC: squamous cell carcinoma, LCC: large cell carcinoma).

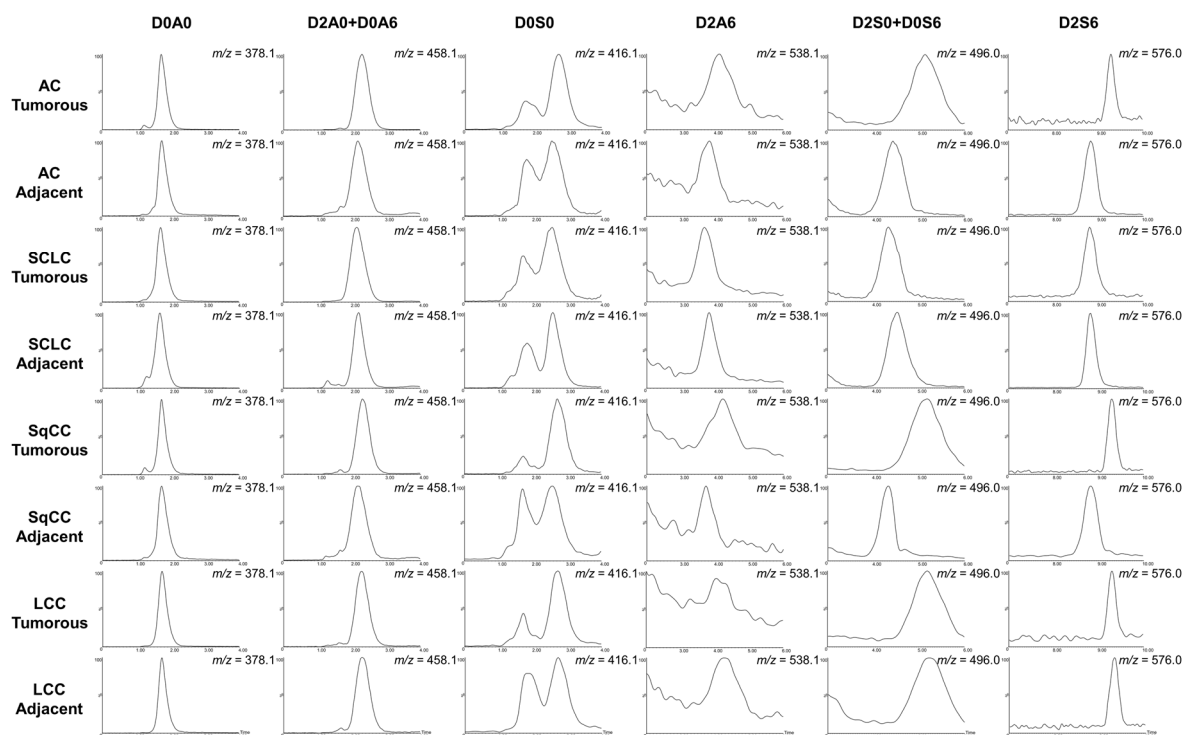

Figure S8. Representative extracted ion chromatograms of HS disaccharides of the investigated LC tumor types and tumor adjacent normal regions. (AC: adenocarcinoma, SCLC: small cell lung cancer, SqCC: squamous cell carcinoma, LCC: large cell carcinoma).
